# Supplementary material
Source: publisher site journal article supplement (https://www.spandidos-publications.com/3588/downloadSupplementary)

Figure S1. Quantitative PCR was used to screen MCM8-knockdown efficiency in different shMCM8 groups. \*\*\* $P < 0.001$  compared with shCtrl. MCM8, minichromosome maintenance 8 homologous recombination repair factor; sh, short hairpin.

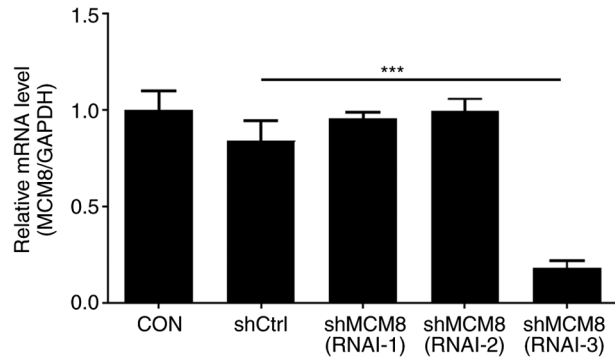

Supplement: Supplementary file 1 [file downloadSupplementary]
